1 **Delayed effects of cigarette graphic warning labels on smoking behavior**

2 Zhenhao Shi, PhD<sup>1</sup>, An-Li Wang, PhD<sup>2</sup>, Janet Audrain-McGovern, PhD<sup>1</sup>, Kevin G. Lynch, PhD<sup>1</sup>, James  
3 Loughead, PhD<sup>1</sup>, Daniel D. Langleben, MD<sup>1</sup>

4 <sup>1</sup>Department of Psychiatry, University of Pennsylvania Perelman School of Medicine, Philadelphia, PA  
5 19104

6 <sup>2</sup>Department of Psychiatry, Icahn School of Medicine at Mount Sinai, New York, NY 10029

7

8 **Corresponding author:** Daniel D. Langleben, MD

9 3535 Market St Ste 500, Philadelphia, PA 19104. Email: [langlebe@pennmedicine.upenn.edu](mailto:langlebe@pennmedicine.upenn.edu).

10

11

1 **ABSTRACT**

2 Graphic warning labels (GWLs) on cigarette packs are widely employed to communicate smoking-related  
3 health risks. Most GWLs elicit high emotional arousal. Our recent study showed lower efficacy of high-  
4 arousal GWLs than low-arousal ones during 4 weeks of naturalistic exposure. Here, we conducted a  
5 secondary analysis to investigate the delayed effects of GWLs on smoking severity after the end of the 4-  
6 week exposure. In 112 adult smokers (56 high-arousal, 56 low-arousal), there was a significant reduction  
7 in the number of cigarettes smoked per day (CPD) from immediately post-exposure to 4 weeks post-  
8 exposure. The high-arousal and low-arousal groups did not differ in CPD reduction. Our study suggests  
9 lasting impact of GWLs on smoking behavior. The finding may be particularly relevant to the high-  
10 arousal GWLs, whose efficacy is not as pronounced during direct and continuous exposure.

11

## 1 INTRODUCTION

2 Graphic cigarette warning labels (GWLs) are employed in over 100 countries to communicate smoking-  
3 related health hazards. The US legislation has also mandated GWLs, but so far the FDA has been unable  
4 to overcome courts' skepticism about GWLs' effectiveness<sup>1,2</sup>. Most GWLs feature aversive graphics that  
5 elicit strong emotional reaction (ER)<sup>3</sup>. The level of aversiveness has been a key obstacle to GWL  
6 adoption in the US<sup>1</sup>. Our prior studies show that high-ER GWLs are better remembered<sup>4</sup> but less  
7 effective than low-ER GWLs in reducing smoking under naturalistic conditions<sup>5</sup>. High-ER GWLs may  
8 trigger maladaptive processes, such as distress<sup>6</sup>, avoidance<sup>7</sup>, and reactance<sup>8</sup>, that attenuate their efficacy.  
9 We hypothesized that discontinuing GWLs after chronic exposure may allow smokers to recover from  
10 such immediate counterproductive processes while still benefiting from the retained memory of the  
11 warnings. Here, we performed a secondary analysis<sup>5</sup> to investigate smoking behavior change four weeks  
12 after the completion of a month-long exposure to GWLs in a cohort of US smokers.

13

## 14 METHODS

15 168 adult smokers were exposed to high-ER (n=84) or low-ER (n=84) GWLs for four weeks and received  
16 weekly supply of cigarettes during weeks 0–4<sup>5</sup>. Cigarette packages dispensed in week 0 had the current  
17 Surgeon General's text-only warning, and those in weeks 1–4 carried experimental GWLs developed by  
18 the FDA<sup>9</sup>. The number of cigarettes smoked per day (CPD) was measured before (week 0), during  
19 (weeks 1–3), immediately after (week 4), and four weeks after (week 8) the end of GWL exposure. A  
20 generalized estimating equation model examined the effects of group (high-ER vs. low-ER), time (week 4  
21 vs. 8), and group×time interaction on CPD while controlling for week 0. The study protocol was approved  
22 by the University of Pennsylvania Institutional Review Board. See Shi, et al.<sup>5</sup> and the **Supplementary**  
23 **Information** for additional details on the methods.

24

## 1 RESULTS

2 CPD at week 4 and 8 was assessed in 123 and 112 participants, respectively. Participant characteristics are  
3 summarized in **Table S1**. The group×time interaction was not significant ( $\chi^2(1)=0.11$ ,  $p=0.74$ ). There were  
4 significant main effects of group (high-ER vs. low-ER, log<sub>10</sub>-transformed mean±standard  
5 error=1.00±0.02 vs. 0.95±0.02,  $\chi^2(1)=5.12$ ,  $p=0.023$ ) and time (week 4 vs. 8, 1.02±0.01 vs. 0.93±0.02,  
6  $\chi^2(1)=10.52$ ,  $p=0.001$ ) (see **Figure 1**). Alternative approaches to handling missing data yielded similar  
7 results (see the **Supplementary Information**).

8

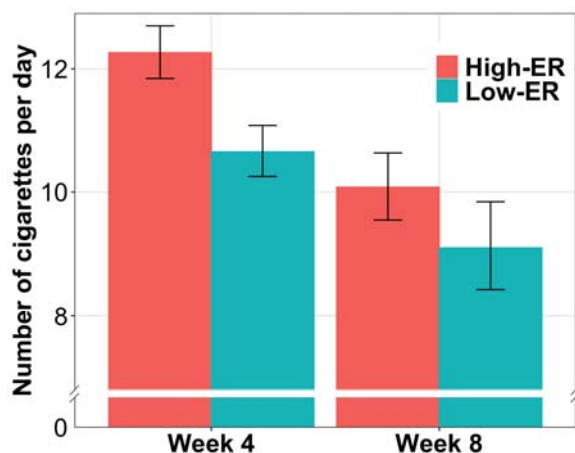

9

10 **Figure 1.** Significant reduction in the number of cigarettes smoked per day from week 4 to week 8.

11 **Abbreviation:** ER, emotion reaction.

12

## 13 DISCUSSION

14 We found decreased smoking severity at the 8-week timepoint, i.e., four weeks after the end of a month-  
15 long GWL exposure. This effect may reflect successful assimilation of warning information through  
16 learning and memory during GWL exposure, leading to tangible behavior change in the long run<sup>10</sup>. The  
17 lack of group×time interaction indicates comparable smoking reduction after high-ER and low-ER GWL  
18 exposure. However, the finding may be particularly relevant to high-ER GWLs, which are less effective  
19 than low-ER ones during direct and continuous exposure<sup>5</sup>. While the mechanisms underlying such

1 disparity require further investigation<sup>6-8</sup>, our finding suggests that intermittent rather than continuous  
2 exposure of smokers to high-ER GWLs may improve their efficacy.

3

#### 4 **FUNDING**

5 This study was supported by the National Institute on Drug Abuse (NIDA) of the National Institutes of  
6 Health (NIH) and the Center for Tobacco Products of the Food and Drug Administration (FDA) under  
7 award number R01DA036028 (PI: DDL); NIH/NIDA under award number K01DA051709 (PI: ZS); and  
8 the Eunice Kennedy Shriver National Institute of Child Health and Human Development (NICHD) of the  
9 NIH under award number R00HD084746 (PI: ALW). The content is solely the responsibility of the  
10 authors and does not necessarily represent the official views of the NIH or the FDA.

11

#### 12 **DECLARATION OF INTERESTS**

13 The authors report no conflicts of interest in this work.

14

#### 15 **AUTHOR CONTRIBUTIONS**

16 **Zhenhao Shi:** formal analysis (equal), investigation (equal), methodology (equal), software (lead),  
17 validation (lead), original draft preparation (lead), review & editing (equal). **An-Li Wang:**  
18 conceptualization (supportive), data curation (supportive), funding acquisition (supportive), project  
19 administration (supportive), supervision (supportive), review & editing (equal). **Janet Audrain-**  
20 **McGovern:** investigation (supportive), original draft preparation (supportive), review & editing (equal).  
21 **Kevin G. Lynch:** formal analysis (equal), investigation (supportive), methodology (equal), software  
22 (supportive), validation (supportive), original draft preparation (supportive), review & editing (equal).  
23 **James Loughead:** investigation (supportive), resources (supportive), review & editing (equal). **Daniel D.**  
24 **Langleben:** conceptualization (lead), data curation (lead), funding acquisition (lead), investigation (equal),

1 project administration (lead), resources (lead), supervision (lead), original draft preparation (supportive),  
2 review & editing (equal).

3

#### 4 **REFERENCES**

- 5 1. R.J. Reynolds Tobacco Company, et al. v. U.S. Food & Drug Administration, et al.: U.S. Court of  
6 Appeals for the DC Circuit, 2012:1205.
- 7 2. R.J. Reynolds Tobacco Company, et al. v. U.S. Food & Drug Administration, et al.: U.S. District Court  
8 for the Eastern District of Texas, 2020.
- 9 3. Tobacco-Free Kids Action Fund. Global issues: warning labels (available:  
10 [www.tobaccofreekids.org/what-we-do/global/warning-labels](http://www.tobaccofreekids.org/what-we-do/global/warning-labels) [accessed July 1, 2023]) 2021.
- 11 4. Wang A-L, Shi Z, Fairchild VP, et al. Emotional salience of the image component facilitates recall of  
12 the text of cigarette warning labels. *European Journal of Public Health* 2019;29(1):153-58.
- 13 5. Shi Z, Wang A-L, Fairchild VP, et al. Effects of emotional arousal on the neural impact and behavioral  
14 efficacy of cigarette graphic warning labels. *Addiction* 2023;118(5):914-24.
- 15 6. Brown SL, Smith EZ. The inhibitory effect of a distressing anti-smoking message on risk perceptions in  
16 smokers. *Psychology & Health* 2007;22(3):255-68.
- 17 7. Maynard OM, Attwood A, O'Brien L, et al. Avoidance of cigarette pack health warnings among regular  
18 cigarette smokers. *Drug and Alcohol Dependence* 2014;136:170-74.
- 19 8. Erceg-Hurn DM, Steed LG. Does exposure to cigarette health warnings elicit psychological reactance  
20 in smokers? *Journal of Applied Social Psychology* 2011;41(1):219-37.
- 21 9. Nonnemaker J, Farrelly M, Kamyab K, et al. Experimental study of graphic cigarette warning labels  
22 (Contract No. HHSF-223-2009-10135G, RTI Project No. 0212305.007.003). RTI International,  
23 Research Triangle Park, NC, 2010.

- 1 10. Shoots-Reinhard B, Erford B, Romer D, et al. Numeracy and memory for risk probabilities and risk  
2 outcomes depicted on cigarette warning labels. *Health Psychology* 2020;39(8):721-30.

3
